# Supplementary material for: Identification of ruptured intracranial aneurysms using the aneurysm-specific prediction score in patients with multiple aneurysms with subarachnoid hemorrhages- a Chinese population based external validation study
Source: BMC Neurol. 2022 Jun 1;22:201. doi: 10.1186/s12883-022-02727-w (PMC9158357; doi:10.1186/s12883-022-02727-w)
Supplement: Supplementary file 1 — Additional file 1. [file 12883_2022_2727_MOESM1_ESM.xls]

## Sheet: Sheet1
Patients	Sex (man,0; woman, 1)	Age	Location (anterior communicating artery,1; anterior cerebral artery,2; middle cerebral artery,3;posterior communicating artery,4;internal carotid artery,5; posterior circulation,6)	Shape(regular,0)	Max Size	Rupture (Yes,1; No, 0)	A	B	C	ASP score
1	1	76	3	0	2.8	0	0.11956	-0.4055	0	-0.28594
1	1	76	4	1	7.1	0	0.30317	-0.0104	0.5387	0.83147
1	1	76	5	0	3	0	0.1281	-0.5973	0	-0.4692
1	1	76	4	1	6.6	1	0.28182	-0.0104	0.5387	0.81012
2	1	51	1	0	2.2	0	0.09394	0	0	0.09394
2	1	51	4	1	8.7	1	0.37149	-0.0104	0.5387	0.89979
3	0	45	3	0	9.8	0	0.41846	-0.4055	0	0.01296
3	0	45	1	1	15	1	0.6405	0	0.5387	1.1792
4	1	66	5	0	4.3	0	0.18361	-0.5973	0	-0.41369
4	1	66	6	1	12.3	1	0.52521	-0.1831	0.5387	0.88081
5	1	74	5	1	16.4	0	0.70028	-0.5973	0.5387	0.64168
5	1	74	4	1	10.3	1	0.43981	-0.0104	0.5387	0.96811
6	1	70	4	1	10.9	0	0.46543	-0.0104	0.5387	0.99373
6	1	70	4	1	12	1	0.5124	-0.0104	0.5387	1.0407
7	1	57	3	0	5.9	0	0.25193	-0.4055	0	-0.15357
7	1	57	3	1	6.5	1	0.27755	-0.4055	0.5387	0.41075
8	1	47	2	0	2	0	0.0854	0	0	0.0854
8	1	47	4	1	6.5	0	0.27755	-0.0104	0.5387	0.80585
8	1	47	4	1	7	1	0.2989	-0.0104	0.5387	0.8272
9	1	55	5	0	3.4	0	0.14518	-0.5973	0	-0.45212
9	1	55	5	0	2.9	0	0.12383	-0.5973	0	-0.47347
9	1	55	3	0	6.5	1	0.27755	-0.4055	0	-0.12795
9	1	55	3	0	5.9	0	0.25193	-0.4055	0	-0.15357
10	1	56	4	1	5.4	0	0.23058	-0.0104	0.5387	0.75888
10	1	56	4	1	10.4	1	0.44408	-0.0104	0.5387	0.97238
11	1	50	1	0	4.9	0	0.20923	0	0	0.20923
11	1	50	1	0	7.9	1	0.33733	0	0	0.33733
12	1	64	4	0	6.2	0	0.26474	-0.0104	0	0.25434
12	1	64	4	1	10.5	1	0.44835	-0.0104	0.5387	0.97665
13	1	59	3	0	5.9	0	0.25193	-0.4055	0	-0.15357
13	1	59	1	1	10.4	1	0.44408	0	0.5387	0.98278
14	1	63	4	1	7	0	0.2989	-0.0104	0.5387	0.8272
14	1	63	4	1	5.7	1	0.24339	-0.0104	0.5387	0.77169
15	1	41	1	0	2.4	0	0.10248	0	0	0.10248
15	1	41	2	0	5	1	0.2135	0	0	0.2135
16	1	51	4	1	4.6	0	0.19642	-0.0104	0.5387	0.72472
16	1	51	4	1	6.9	1	0.29463	-0.0104	0.5387	0.82293
17	0	41	3	0	2	0	0.0854	-0.4055	0	-0.3201
17	0	41	3	0	3	1	0.1281	-0.4055	0	-0.2774
18	1	66	5	0	3.3	0	0.14091	-0.5973	0	-0.45639
18	1	66	6	0	3.3	0	0.14091	-0.1831	0	-0.04219
18	1	66	4	1	3.5	1	0.14945	-0.0104	0.5387	0.67775
19	0	56	3	0	6.4	0	0.27328	-0.4055	0	-0.13222
19	0	56	4	1	7.6	0	0.32452	-0.0104	0.5387	0.85282
19	0	56	4	1	11	1	0.4697	-0.0104	0.5387	0.998
20	1	68	3	1	6.8	0	0.29036	-0.4055	0.5387	0.42356
20	1	68	4	1	5.4	0	0.23058	-0.0104	0.5387	0.75888
20	1	68	4	0	6.7	1	0.28609	-0.0104	0	0.27569
21	0	44	5	0	4.1	0	0.17507	-0.5973	0	-0.42223
21	0	44	4	1	6.7	1	0.28609	-0.0104	0.5387	0.81439
22	1	60	3	0	5	0	0.2135	-0.4055	0	-0.192
22	1	60	3	1	8.7	0	0.37149	-0.4055	0.5387	0.50469
22	1	60	4	1	10.3	1	0.43981	-0.0104	0.5387	0.96811
23	1	72	3	0	4.9	0	0.20923	-0.4055	0	-0.19627
23	1	72	2	1	8	1	0.3416	0	0.5387	0.8803
24	1	43	5	0	3.9	0	0.16653	-0.5973	0	-0.43077
24	1	43	4	1	10.7	1	0.45689	-0.0104	0.5387	0.98519
25	0	57	5	0	2.3	0	0.09821	-0.5973	0	-0.49909
25	0	57	5	0	4.9	1	0.20923	-0.5973	0	-0.38807
26	1	58	5	0	3.7	0	0.15799	-0.5973	0	-0.43931
26	1	58	4	1	7.7	1	0.32879	-0.0104	0.5387	0.85709
27	0	51	5	0	3.9	0	0.16653	-0.5973	0	-0.43077
27	0	51	3	1	7.7	1	0.32879	-0.4055	0.5387	0.46199
28	0	62	5	0	2.3	0	0.09821	-0.5973	0	-0.49909
28	0	62	6	1	7.8	1	0.33306	-0.1831	0.5387	0.68866
29	1	70	3	0	4.5	0	0.19215	-0.4055	0	-0.21335
29	1	70	3	0	6.6	1	0.28182	-0.4055	0	-0.12368
30	1	76	1	1	6.5	0	0.27755	0	0.5387	0.81625
30	1	76	4	1	7.4	1	0.31598	-0.0104	0.5387	0.84428
31	0	50	5	0	3.3	0	0.14091	-0.5973	0	-0.45639
31	0	50	5	0	3	1	0.1281	-0.5973	0	-0.4692
32	1	59	5	0	4	0	0.1708	-0.5973	0	-0.4265
32	1	59	4	0	3.9	1	0.16653	-0.0104	0	0.15613
33	1	62	6	0	4	0	0.1708	-0.1831	0	-0.0123
33	1	62	6	1	10.6	1	0.45262	-0.1831	0.5387	0.80822
34	1	57	4	0	5.4	0	0.23058	-0.0104	0	0.22018
34	1	57	3	0	11.6	1	0.49532	-0.4055	0	0.08982
35	1	58	3	1	7.5	1	0.32025	-0.4055	0.5387	0.45345
35	1	58	3	0	3.8	0	0.16226	-0.4055	0	-0.24324
36	0	59	2	0	5	0	0.2135	0	0	0.2135
36	0	59	3	1	4.4	1	0.18788	-0.4055	0.5387	0.32108
37	1	72	5	0	4.5	0	0.19215	-0.5973	0	-0.40515
37	1	72	2	0	6.9	1	0.29463	0	0	0.29463
38	1	64	5	0	5.6	0	0.23912	-0.5973	0	-0.35818
38	1	64	4	0	4.5	1	0.19215	-0.0104	0	0.18175
39	1	64	1	0	4.1	0	0.17507	0	0	0.17507
39	1	64	3	0	6.3	0	0.26901	-0.4055	0	-0.13649
39	1	64	4	1	13.9	1	0.59353	-0.0104	0.5387	1.12183
40	0	45	5	1	4.1	0	0.17507	-0.5973	0.5387	0.11647
40	0	45	4	1	8.8	1	0.37576	-0.0104	0.5387	0.90406
41	1	51	4	0	4.3	0	0.18361	-0.0104	0	0.17321
41	1	51	5	0	5.3	1	0.22631	-0.5973	0	-0.37099
42	0	43	1	1	7.4	0	0.31598	0	0.5387	0.85468
42	0	43	5	1	14	1	0.5978	-0.5973	0.5387	0.5392
43	1	48	1	0	5.1	0	0.21777	0	0	0.21777
43	1	48	3	0	3.6	1	0.15372	-0.4055	0	-0.25178
44	1	66	4	1	6.4	0	0.27328	-0.0104	0.5387	0.80158
44	1	66	4	1	10.5	1	0.44835	-0.0104	0.5387	0.97665
45	0	50	3	0	3.3	0	0.14091	-0.4055	0	-0.26459
45	0	50	1	0	7.5	1	0.32025	0	0	0.32025
46	1	55	5	0	3.5	0	0.14945	-0.5973	0	-0.44785
46	1	55	3	1	8.6	1	0.36722	-0.4055	0.5387	0.50042
47	1	58	4	1	3.2	0	0.13664	-0.0104	0.5387	0.66494
47	1	58	1	1	4	1	0.1708	0	0.5387	0.7095
48	1	72	3	0	4.8	0	0.20496	-0.4055	0	-0.20054
48	1	72	4	0	6.5	1	0.27755	-0.0104	0	0.26715
49	1	55	3	0	3.4	0	0.14518	-0.4055	0	-0.26032
49	1	55	4	0	6.3	0	0.26901	-0.0104	0	0.25861
49	1	55	4	1	8.4	1	0.35868	-0.0104	0.5387	0.88698
50	0	48	4	1	3.9	0	0.16653	-0.0104	0.5387	0.69483
50	0	48	4	1	7.9	1	0.33733	-0.0104	0.5387	0.86563
51	1	48	5	0	2.7	0	0.11529	-0.5973	0	-0.48201
51	1	48	4	1	5.2	1	0.22204	-0.0104	0.5387	0.75034
52	0	45	3	0	3.4	0	0.14518	-0.4055	0	-0.26032
52	0	45	3	1	6.3	1	0.26901	-0.4055	0.5387	0.40221
53	0	44	1	0	3.3	0	0.14091	0	0	0.14091
53	0	44	1	0	6.2	1	0.26474	0	0	0.26474
54	1	82	5	0	5.7	0	0.24339	-0.5973	0	-0.35391
54	1	82	3	0	4.1	1	0.17507	-0.4055	0	-0.23043
55	0	51	3	0	5.4	0	0.23058	-0.4055	0	-0.17492
55	0	51	4	0	5.9	1	0.25193	-0.0104	0	0.24153
56	1	68	3	0	4.2	0	0.17934	-0.4055	0	-0.22616
56	1	68	3	0	5.1	1	0.21777	-0.4055	0	-0.18773
57	1	55	4	1	4.4	0	0.18788	-0.0104	0.5387	0.71618
57	1	55	4	1	5.7	1	0.24339	-0.0104	0.5387	0.77169
58	1	60	3	0	2.1	0	0.08967	-0.4055	0	-0.31583
58	1	60	3	0	2.6	0	0.11102	-0.4055	0	-0.29448
58	1	60	2	1	6	1	0.2562	0	0.5387	0.7949
59	1	69	3	0	2.4	0	0.10248	-0.4055	0	-0.30302
59	1	69	3	1	7.8	1	0.33306	-0.4055	0.5387	0.46626
60	1	66	5	0	5.8	0	0.24766	-0.5973	0	-0.34964
60	1	66	2	1	7	1	0.2989	0	0.5387	0.8376
61	1	45	5	0	3.7	0	0.15799	-0.5973	0	-0.43931
61	1	45	1	0	8.3	1	0.35441	0	0	0.35441
62	1	75	4	0	4.6	0	0.19642	-0.0104	0	0.18602
62	1	75	4	1	7.3	1	0.31171	-0.0104	0.5387	0.84001
63	1	58	4	0	2.6	0	0.11102	-0.0104	0	0.10062
63	1	58	4	0	7.6	1	0.32452	-0.0104	0	0.31412
64	1	71	4	0	7.8	0	0.33306	-0.0104	0	0.32266
64	1	71	1	1	7.9	1	0.33733	0	0.5387	0.87603
65	1	69	5	0	6.5	0	0.27755	-0.5973	0	-0.31975
65	1	69	4	1	7.7	1	0.32879	-0.0104	0.5387	0.85709
66	0	78	3	1	7.3	0	0.31171	-0.4055	0.5387	0.44491
66	0	78	4	0	3.7	1	0.15799	-0.0104	0	0.14759
67	1	57	4	0	3.5	0	0.14945	-0.0104	0	0.13905
67	1	57	4	1	10.1	1	0.43127	-0.0104	0.5387	0.95957
68	1	39	4	0	2.9	0	0.12383	-0.0104	0	0.11343
68	1	39	4	1	7.5	1	0.32025	-0.0104	0.5387	0.84855
69	1	33	3	0	3.8	0	0.16226	-0.4055	0	-0.24324
69	1	33	1	1	5.8	1	0.24766	0	0.5387	0.78636
70	1	66	1	0	2.7	0	0.11529	0	0	0.11529
70	1	66	4	0	5.7	1	0.24339	-0.0104	0	0.23299
71	1	83	4	0	6	0	0.2562	-0.0104	0	0.2458
71	1	83	4	1	16.9	1	0.72163	-0.0104	0.5387	1.24993
72	1	78	3	1	6.1	0	0.26047	-0.4055	0.5387	0.39367
72	1	78	5	0	8.4	1	0.35868	-0.5973	0	-0.23862
73	1	53	4	0	3.4	0	0.14518	-0.0104	0	0.13478
73	1	53	4	1	10.6	1	0.45262	-0.0104	0.5387	0.98092
74	1	50	4	0	3.3	0	0.14091	-0.0104	0	0.13051
74	1	50	5	0	7.3	0	0.31171	-0.5973	0	-0.28559
74	1	50	5	1	20.7	1	0.88389	-0.5973	0.5387	0.82529
75	1	39	5	0	17.5	0	0.74725	-0.5973	0	0.14995
75	1	39	5	1	12.4	1	0.52948	-0.5973	0.5387	0.47088
76	1	63	5	0	3.6	0	0.15372	-0.5973	0	-0.44358
76	1	63	4	1	9	1	0.3843	-0.0104	0.5387	0.9126
77	1	37	5	1	8.6	0	0.36722	-0.5973	0.5387	0.30862
77	1	37	5	1	10.4	1	0.44408	-0.5973	0.5387	0.38548
78	1	77	5	0	5.6	0	0.23912	-0.5973	0	-0.35818
78	1	77	4	0	5.1	1	0.21777	-0.0104	0	0.20737
79	1	66	4	0	3.9	0	0.16653	-0.0104	0	0.15613
79	1	66	4	1	8.3	1	0.35441	-0.0104	0.5387	0.88271
80	1	43	3	0	3.6	0	0.15372	-0.4055	0	-0.25178
80	1	43	3	0	4.6	1	0.19642	-0.4055	0	-0.20908
81	1	61	3	1	6	0	0.2562	-0.4055	0.5387	0.3894
81	1	61	3	1	6.6	0	0.28182	-0.4055	0.5387	0.41502
81	1	61	3	1	14.6	1	0.62342	-0.4055	0.5387	0.75662
82	0	49	3	0	4.2	0	0.17934	-0.4055	0	-0.22616
82	0	49	3	0	5.6	1	0.23912	-0.4055	0	-0.16638
83	0	49	3	0	3.4	0	0.14518	-0.4055	0	-0.26032
83	0	49	3	1	9	1	0.3843	-0.4055	0.5387	0.5175
84	0	42	5	0	5.7	0	0.24339	-0.5973	0	-0.35391
84	0	42	4	1	5.2	1	0.22204	-0.0104	0.5387	0.75034
85	1	59	3	0	4	0	0.1708	-0.4055	0	-0.2347
85	1	59	3	0	6	1	0.2562	-0.4055	0	-0.1493
86	0	57	2	0	7.5	0	0.32025	0	0	0.32025
86	0	57	1	0	6.1	1	0.26047	0	0	0.26047
87	1	70	3	0	3.2	0	0.13664	-0.4055	0	-0.26886
87	1	70	4	1	7.5	1	0.32025	-0.0104	0.5387	0.84855
88	0	71	4	1	8.9	0	0.38003	-0.0104	0.5387	0.90833
88	0	71	4	1	8.9	1	0.38003	-0.0104	0.5387	0.90833
89	1	59	4	1	6.1	0	0.26047	-0.0104	0.5387	0.78877
89	1	59	4	1	10.1	1	0.43127	-0.0104	0.5387	0.95957
90	1	62	3	0	2.6	0	0.11102	-0.4055	0	-0.29448
90	1	62	3	1	6.4	1	0.27328	-0.4055	0.5387	0.40648
91	1	50	4	0	4.6	0	0.19642	-0.0104	0	0.18602
91	1	50	4	1	7.1	1	0.30317	-0.0104	0.5387	0.83147
92	0	63	1	0	2.9	0	0.12383	0	0	0.12383
92	0	63	3	1	8.4	1	0.35868	-0.4055	0.5387	0.49188
93	0	63	2	0	2.5	0	0.10675	0	0	0.10675
93	0	63	3	1	8.4	1	0.35868	-0.4055	0.5387	0.49188
94	1	38	5	0	3.6	0	0.15372	-0.5973	0	-0.44358
94	1	38	3	0	5.5	1	0.23485	-0.4055	0	-0.17065
95	1	48	4	0	4	0	0.1708	-0.0104	0	0.1604
95	1	48	3	1	10.8	1	0.46116	-0.4055	0.5387	0.59436
96	1	48	5	0	4.6	0	0.19642	-0.5973	0	-0.40088
96	1	48	3	1	8.1	1	0.34587	-0.4055	0.5387	0.47907
97	0	48	6	0	7.1	0	0.30317	-0.1831	0	0.12007
97	0	48	4	0	11.8	1	0.50386	-0.0104	0	0.49346
98	1	69	3	0	1.8	0	0.07686	-0.4055	0	-0.32864
98	1	69	5	0	4.4	0	0.18788	-0.5973	0	-0.40942
98	1	69	6	0	2.6	0	0.11102	-0.1831	0	-0.07208
98	1	69	2	1	6.9	1	0.29463	0	0.5387	0.83333
99	1	63	3	0	4.1	0	0.17507	-0.4055	0	-0.23043
99	1	63	4	1	9.5	1	0.40565	-0.0104	0.5387	0.93395
100	1	72	3	1	6.9	0	0.29463	-0.4055	0.5387	0.42783
100	1	72	3	0	4.1	1	0.17507	-0.4055	0	-0.23043
101	1	37	5	0	4.5	0	0.19215	-0.5973	0	-0.40515
101	1	37	3	0	5.7	1	0.24339	-0.4055	0	-0.16211
102	1	60	5	0	4	0	0.1708	-0.5973	0	-0.4265
102	1	60	4	1	8.9	1	0.38003	-0.0104	0.5387	0.90833
103	0	49	5	0	3.4	0	0.14518	-0.5973	0	-0.45212
103	0	49	3	0	6.3	1	0.26901	-0.4055	0	-0.13649
104	1	37	5	0	4.7	0	0.20069	-0.5973	0	-0.39661
104	1	37	4	1	7.9	1	0.33733	-0.0104	0.5387	0.86563
105	1	57	3	0	2.6	0	0.11102	-0.4055	0	-0.29448
105	1	57	6	1	15.9	1	0.67893	-0.1831	0.5387	1.03453
106	1	52	3	0	2.5	0	0.10675	-0.4055	0	-0.29875
106	1	52	1	1	8.6	1	0.36722	0	0.5387	0.90592
106	1	52	5	0	4.1	0	0.17507	-0.5973	0	-0.42223
107	1	63	4	0	4	1	0.1708	-0.0104	0	0.1604
107	1	63	4	1	4.7	0	0.20069	-0.0104	0.5387	0.72899
108	1	73	3	0	4.2	0	0.17934	-0.4055	0	-0.22616
108	1	73	4	1	7.3	1	0.31171	-0.0104	0.5387	0.84001
109	1	66	2	1	4.2	1	0.17934	0	0.5387	0.71804
109	1	66	3	0	5	0	0.2135	-0.4055	0	-0.192
110	1	73	4	1	6.2	1	0.26474	-0.0104	0.5387	0.79304
110	1	73	6	1	4.1	0	0.17507	-0.1831	0.5387	0.53067
111	1	58	4	1	2.4	0	0.10248	-0.0104	0.5387	0.63078
111	1	58	4	0	4.8	1	0.20496	-0.0104	0	0.19456
112	0	44	6	1	7.9	1	0.33733	-0.1831	0.5387	0.69293
112	0	44	6	0	2.5	0	0.10675	-0.1831	0	-0.07635
113	1	80	4	1	8.2	1	0.35014	-0.0104	0.5387	0.87844
113	1	80	3	1	7.9	0	0.33733	-0.4055	0.5387	0.47053
114	1	86	3	0	4.9	0	0.20923	-0.4055	0	-0.19627
114	1	86	3	1	10.5	1	0.44835	-0.4055	0.5387	0.58155
114	1	86	3	0	12	0	0.5124	-0.4055	0	0.1069
114	1	86	5	1	6.2	0	0.26474	-0.5973	0.5387	0.20614
115	1	78	2	1	11	1	0.4697	0	0.5387	1.0084
115	1	78	6	0	3.9	0	0.16653	-0.1831	0	-0.01657
116	0	63	3	1	14.7	1	0.62769	-0.4055	0.5387	0.76089
116	0	63	3	1	5.7	0	0.24339	-0.4055	0.5387	0.37659
117	1	47	5	1	14.8	0	0.63196	-0.5973	0.5387	0.57336
117	1	47	1	1	10.5	1	0.44835	0	0.5387	0.98705
118	0	77	1	1	7.3	1	0.31171	0	0.5387	0.85041
118	0	77	6	0	8.1	0	0.34587	-0.1831	0	0.16277
119	0	62	1	1	10.1	1	0.43127	0	0.5387	0.96997
119	0	62	4	0	7.9	0	0.33733	-0.0104	0	0.32693
120	0	63	2	1	7.3	1	0.31171	0	0.5387	0.85041
120	0	63	3	0	4.9	0	0.20923	-0.4055	0	-0.19627
121	1	78	1	1	4.6	1	0.19642	0	0.5387	0.73512
121	1	78	3	0	3.8	0	0.16226	-0.4055	0	-0.24324
122	1	48	4	0	4.5	0	0.19215	-0.0104	0	0.18175
122	1	48	4	0	3.4	0	0.14518	-0.0104	0	0.13478
122	1	48	6	0	9.8	1	0.41846	-0.1831	0	0.23536
123	1	62	1	1	4.5	0	0.19215	0	0.5387	0.73085
123	1	62	3	1	10.7	1	0.45689	-0.4055	0.5387	0.59009
123	1	62	3	0	4.3	0	0.18361	-0.4055	0	-0.22189
124	1	61	4	1	4.9	1	0.20923	-0.0104	0.5387	0.73753
124	1	61	3	0	4.2	0	0.17934	-0.4055	0	-0.22616
125	1	73	4	1	10.4	1	0.44408	-0.0104	0.5387	0.97238
125	1	73	4	0	7.1	0	0.30317	-0.0104	0	0.29277
126	1	72	4	0	5.7	1	0.24339	-0.0104	0	0.23299
126	1	72	5	0	4.3	0	0.18361	-0.5973	0	-0.41369
127	1	74	3	1	9.8	1	0.41846	-0.4055	0.5387	0.55166
127	1	74	3	0	3.4	0	0.14518	-0.4055	0	-0.26032
127	1	74	6	0	7.4	0	0.31598	-0.1831	0	0.13288
128	1	63	4	1	6.6	1	0.28182	-0.0104	0.5387	0.81012
128	1	63	4	1	5.9	0	0.25193	-0.0104	0.5387	0.78023
129	0	56	5	1	8.8	0	0.37576	-0.5973	0.5387	0.31716
129	0	56	1	1	4.9	1	0.20923	0	0.5387	0.74793
130	1	66	4	1	6.2	1	0.26474	-0.0104	0.5387	0.79304
130	1	66	4	0	3	0	0.1281	-0.0104	0	0.1177
131	1	68	4	1	7.9	0	0.33733	-0.0104	0.5387	0.86563
131	1	68	4	1	7.6	1	0.32452	-0.0104	0.5387	0.85282
132	1	44	4	0	3.7	1	0.15799	-0.0104	0	0.14759
132	1	44	4	0	5.3	0	0.22631	-0.0104	0	0.21591
133	1	73	3	0	3.6	0	0.15372	-0.4055	0	-0.25178
133	1	73	3	1	7	1	0.2989	-0.4055	0.5387	0.4321
134	0	79	4	1	6.5	1	0.27755	-0.0104	0.5387	0.80585
134	0	79	3	0	5.5	0	0.23485	-0.4055	0	-0.17065
